# Supplementary material
Source: Springer Nature journal article supplement (https://www.springermedizin.de/resource/supplementary/12913_2011_2260_MOESM2_ESM.pdf/9529938)
Supplement: MOESM2 [file 9529938]

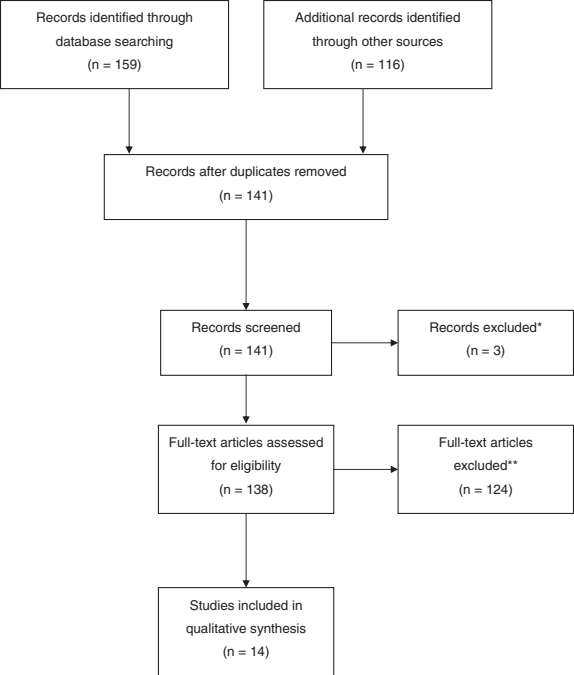

\* Published in other languages than English, French or German

\*\* Wrong publication type (letter, editorial, review, other); no instrument for guideline evaluation
